RESEARCH ARTICLE

# A cautionary note on the use of N-acetylcysteine as a reactive oxygen species antagonist to assess copper mediated cell death

Rebecca E. Graham<sup>1</sup>, Richard J. R. Elliott<sup>2</sup>, Alison F. Munro<sup>2</sup>, Neil O. Carragher<sup>2\*</sup>

**1** Centre for Clinical Brain Sciences, University of Edinburgh, Edinburgh, United Kingdom, **2** Cancer Research UK Scotland Centre, Institute of Genetics and Cancer, University of Edinburgh, Western General Hospital, Edinburgh, United Kingdom

\* [N.Carragher@ed.ac.uk](mailto:N.Carragher@ed.ac.uk)

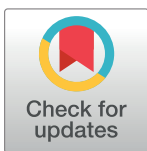

## OPEN ACCESS

**Citation:** Graham RE, Elliott RJR, Munro AF, Carragher NO (2023) A cautionary note on the use of N-acetylcysteine as a reactive oxygen species antagonist to assess copper mediated cell death. PLoS ONE 18(12): e0294297. <https://doi.org/10.1371/journal.pone.0294297>

**Editor:** Abeer El Wakil, Alexandria University, EGYPT

**Received:** July 31, 2023

**Accepted:** October 29, 2023

**Published:** December 11, 2023

**Peer Review History:** PLOS recognizes the benefits of transparency in the peer review process; therefore, we enable the publication of all of the content of peer review and author responses alongside final, published articles. The editorial history of this article is available here: <https://doi.org/10.1371/journal.pone.0294297>

**Copyright:** © 2023 Graham et al. This is an open access article distributed under the terms of the [Creative Commons Attribution License](https://creativecommons.org/licenses/by/4.0/), which permits unrestricted use, distribution, and reproduction in any medium, provided the original author and source are credited.

**Data Availability Statement:** All relevant data are within the paper and its [Supporting Information](#) files.

## Abstract

A new form of cell death has recently been proposed involving copper-induced cell death, termed cuproptosis. This new form of cell death has been widely studied in relation to a novel class of copper ionophores, including elesclomol and disulfiram. However, the exact mechanism leading to cell death remains contentious. The oldest and most widely accepted biological mechanism is that the accumulated intracellular copper leads to excessive build-up of reactive oxygen species and that this is what ultimately leads to cell death. Most of this evidence is largely based on studies using N-acetylcysteine (NAC), an antioxidant, to relieve the oxidative stress and prevent cell death. However, here we have demonstrated using inductively coupled mass-spectrometry, that NAC pretreatment significantly reduces intracellular copper uptake triggered by the ionophores, elesclomol and disulfiram, suggesting that reduction in copper uptake, rather than the antioxidant activity of NAC, is responsible for the diminished cell death. We present further data showing that key mediators of reactive oxygen species are not upregulated in response to elesclomol treatment, and further that sensitivity of cancer cell lines to reactive oxygen species does not correlate with sensitivity to these copper ionophores. Our findings are in line with several recent studies proposing the mechanism of cuproptosis is instead via copper mediated aggregation of proteins, resulting in proteotoxic stress leading to cell death. Overall, it is vital to disseminate this key piece of information regarding NAC's activity on copper uptake since new research attributing the effect of NAC on copper ionophore activity to quenching of reactive oxygen species is being published regularly and our studies suggest their conclusions may be misleading.

## Introduction

It has recently been revealed that a novel class of copper ionophores display highly selective and potent cytotoxic activity towards cancer cells. These compounds bind free copper in the

**Funding:** This study was supported by a Cancer Research UK award (CRUK Small Molecule Drug Discovery project) awarded to NOC (C42454/A24892) and an MRC funded 4-year multi-disciplinary PhD studentship offered by the University of Edinburgh, awarded to REG. NOC also received support from Anne Forrest Fund for Oesophageal Cancer Research at the University of Edinburgh, under grant number D61720 to support this study. The funders had no role in study design, data collection and analysis, decision to publish, or preparation of the manuscript.

**Competing interests:** The authors have declared that no competing interests exist.

media and act as a shuttle, bringing it into cancer cells selectively where it accumulates and induces cytotoxic activity [1–4].

Structurally this class of copper ionophores, including elesclomol and disulfiram contain thiocarbonyl groups, and they are known copper chelators. Disulfiram, a thiuram disulphide, breaks down in acidic or Cu(II) rich environments to produce a dithiocarbamate; diethyl-dithiocarbamate (DDTC) [5]. DDTC, like other dithiocarbamates, are known to form complexes with transition elements, but are most stable in a Cu(II) chelate [6]. Although elesclomol is structurally unrelated to the dithiocarbamates, it also forms organometallic complexes, particularly with Cu(II), due to its two thiocarbonyl moieties [7, 8]. We and others, have previously demonstrated that elesclomol and disulfiram act as copper ionophores [1–4, 9]. Incubation of cancer cells with elesclomol and disulfiram leads to a significant increase in intracellular copper levels and eventually cell death. Critically, removal of free copper from the media prior to drug treatment results in complete loss of the drugs cytotoxic effects, demonstrating the essentiality of copper in the cytotoxic mechanism-of-action of these compounds [1–4, 9].

While there is now much evidence demonstrating the role of intracellular copper accumulation in the mechanism of these compounds, the mechanism leading to the cell death downstream of the copper accumulation is still contested. Proposed mechanisms include the production of reactive oxygen species (ROS) [4, 10–13], inhibition of the ubiquitin-proteasome system [14–16], and interference with the mitochondrial electron transport chain [17, 18]. While the mechanism remains to be fully elucidated or may involve multiple mechanisms, the most widely published mechanism involves ROS production [4, 10–13]. Since copper is a redox active metal, it has been proposed that the intracellular copper accumulation leads to the production of ROS and that this is the cause of cell death [4, 10–13]. Much of the evidence for this is based on the ability of N-acetylcysteine (NAC) to alleviate the toxicity of the drugs [10, 12, 13, 19]. NAC is a precursor of L-cysteine that results in glutathione biosynthesis [20]. Further NAC is widely used *in vivo* and *in vitro* as a universal cytoprotective antioxidant [21, 22]. Due to the fact that NAC is widely reported in the literature to be a ROS antagonist, the alleviation of elesclomol and other copper ionophore induced cell death by NAC has been interpreted to support the claim that ROS may underlie the mechanism by which copper ionophores induce cuproptosis. However, the effects of NAC on ROS may be misreported and misunderstood [20, 23] and further NAC has other mechanisms, including an ability to form conjugates with copper [24], thiol-reactive compounds [25] and other electrophiles [20]. Here we explore the mechanism through which NAC mediates relief of copper ionophore induced cell death and importantly demonstrate that it is not via the widely accepted effects of ROS antagonism (Fig 1).

## Materials and methods

### Cell culture

Oesophageal adenocarcinoma (OAC) lines were grown in Roswell Park Memorial Institute (RPMI) (Life Technologies; #11875101) supplemented with FBS (10%, Life Technologies; #16140071) and L-glutamine (2 mM, Life Technologies; #A2916801) and incubated under standard tissue culture conditions (37°C and 5% CO<sub>2</sub>). The oesophageal epithelial line EPC2-hTERT was grown in KSFM (Life Technologies; #17005075) supplemented with human recombinant epidermal growth factor (5g/L) and bovine pituitary extract (50 mg/L).

For subculture of OAC lines, cells were detached with trypsin (0.25%, 1 mL, 5 minutes, 37°C), and neutralised with fresh growth media. For subculture of EPC2-hTERT, soy-bean

### Historic Interpretation of N-Acetylcysteine and Cuproptosis

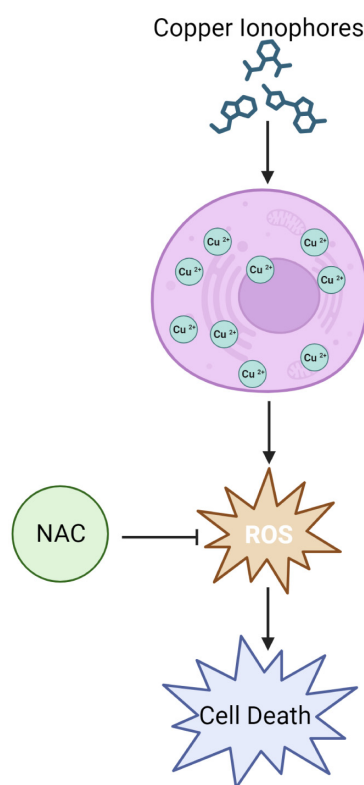

### New Interpretation of N-Acetylcysteine and Cuproptosis

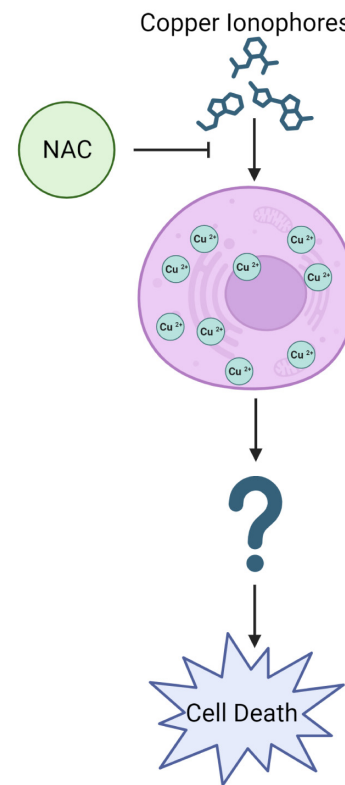

**Fig 1. Schematic of historic and proposed N-acetylcysteine mechanism in the context of Cuproptosis.**

<https://doi.org/10.1371/journal.pone.0294297.g001>

trypsin inhibitor (250 mg/L, 5 mL) was added to neutralise the trypsin and centrifuged (5 minutes, 250 x g). The cell pellet was then re-suspended in fresh media.

Cells were seeded (50  $\mu$ L per well) at 1500 cells per well except SK-GT-4 which was seeded at 1000 cells per well into 384-well, CELLSTAR® Cell Culture Microplates (Greiner, #781091), and incubated under standard tissue culture conditions for 24 hrs before the addition of compounds.

### Cell survival assays

**Copper Ionophore and N-acetylcysteine dose responses.** Cells were plated as described above. Disulfiram and elesclomol dose responses were carried in the presence and absence of a 15 min pre-incubation with 1 or 10 mM NAC (A7250; Sigma). NAC was made up in media and 0.1M NaOH was used to neutralise the media and bring the pH back to 7.4. This was then syringe filtered before being added to the cells. Elesclomol and Disulfiram were added and incubated for 48hrs before plates were fixed and stained with Hoechst 33342 (#H1399; Mol. Probes) and imaged on the ImageXpress micro XLS (Molecular Devices, USA). Images were analysed on the MetaXpress software and dose responses were assessed using the total nuclei counts per well normalized to DMSO controls to calculate percentage cell survival.

**H<sub>2</sub>O<sub>2</sub> dose response.** Cells were plated as described above. H<sub>2</sub>O<sub>2</sub> (H1009; Sigma) was diluted in media to give an 18 point dose response starting at 1 mM and incubated with the cells for 48 hrs. Cell viability was assessed by alamar Blue assay [26].

## Inductively coupled mass spectrometry

5 x 10<sup>6</sup> cells were seeded in a T175 flask and incubated in 25ml RPMI overnight. Media was then replaced with the addition of compound treatments (DMSO (0.1%), disulfiram (600 nM), or elesclomol (200 nM)) with or without a 15 min pre-incubation with 1mM or 10 mM NAC, before further incubation for 6 hrs when cells were then collected. Media was removed and cells were washed in PBS, trypsinised and counted. For each sample 1 x 10<sup>6</sup> cells were pelleted in an Eppendorf, the supernatant was discarded and samples were frozen at -80°C.

For analysis, samples were thawed and concentrated nitric acid was added (100 µL per sample) and mixed. Samples were then vortexed and sonicated and left overnight at room temperature. Samples were made up to 1 mL using Di water and then further diluted tenfold and analysed in the ICP Facility, School of Chemistry, University of Edinburgh.

## Nanostring transcriptomic analysis

All NanoString nCounter analyses were carried out on the Human PanCancer Pathways (Catalogue number XT-CSO-PATH1-1) and Metabolic Pathways (Catalogue number XT-CSO-HMP-12) panels, covering 1449 genes.

Cells were seeded at 8 x 10<sup>4</sup> cells in 6-well plates and incubated under standard tissue culture conditions for 24 hrs. For basal analysis media was then removed and plates were washed twice with ice cold PBS before being snap frozen at -80. For treatment induced analysis, media was replaced with fresh media containing compound treatments (DMSO (0.1%) or elesclomol (200 nM)) before further incubation for 6 hrs, and then samples were processed the same as for basal samples.

For RNA extraction cells were scraped and lysed using QIAshredders (#79654, QIAGEN), RNA was extracted by means of the Qiagen RNeasy Mini kit (#74104, QIAGEN) (with β-mercaptoethanol) according to manufacturer instructions, and included a DNase digestion step (#79254, QIAGEN).

## Results

We have explored NACs ability to alleviate the toxicity of the copper ionophores elesclomol and disulfiram, in two oesophageal cancer lines (OAC-P4C and SK-GT-4). We found, in line with previous research [10, 13], that pretreatment with NAC alleviated elesclomol and disulfiram induced cell death (Fig 2).

However, while 10mM NAC is sufficient to relieve Disulfiram and Elesclomol induced toxicity we found that 1mM NAC does not relieve Elesclomol induced toxicity at all, which has been observed in other cell lines previously [13], but is capable of partially rescuing Disulfiram induced toxicity. The high concentrations required to alleviate cytotoxicity suggest that in this context NAC may be working via mechanisms that are independent or in addition to ROS antagonism for example it has been shown that even submillimolar concentrations of NAC significantly stimulate GSH synthesis [20, 27]. This observation is further supported by results demonstrating other antioxidants, for example trolox [28], and Coenzyme Q10 [13] do not alleviate the activity of elesclomol or disulfiram.

Given these findings and the dual nature of NAC as an antioxidant and the less well-known action as a copper interactor, we felt it was important to assess NACs effect on the intracellular copper levels since it could be acting via either mechanism. To our knowledge this has not been assessed previously. To quantify this, we measured the intracellular copper levels after Elesclomol and Disulfiram treatment with and without NAC preincubation at two concentrations using inductively coupled plasma mass spectrometry (ICP-MS) in the two most sensitive cell lines; OAC-P4C and SK-GT-4. Importantly we demonstrate here for the first time that

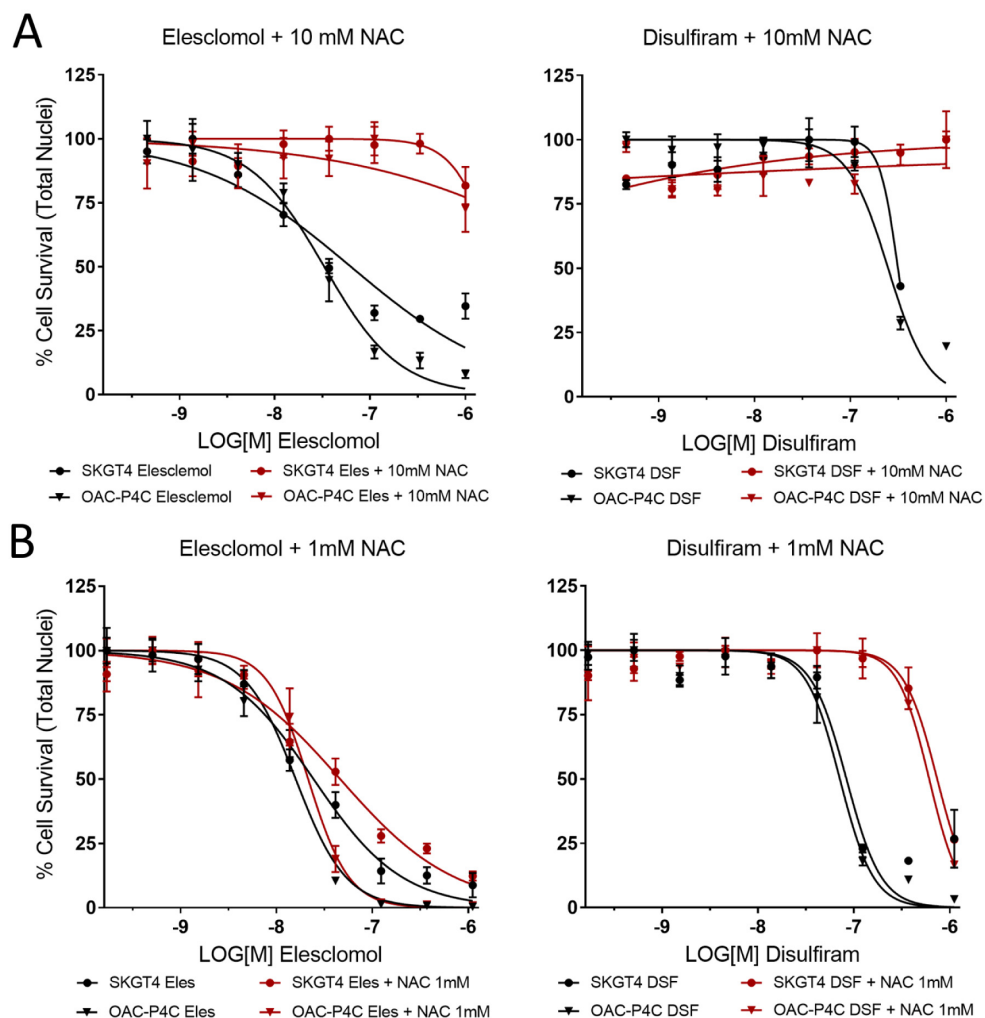

**Fig 2. N-acetylcysteine treatment and copper ionophore induced cell death.** Elesclomol and Disulfiram dose response in OAC-P4C and SK-GT-4 cells with A) 10mM N-acetylcysteine, B) 1mM N-acetylcysteine. NAC = N-acetylcysteine.

<https://doi.org/10.1371/journal.pone.0294297.g002>

pre-incubation of cancer cells with NAC leads to loss of copper accumulation post copper ionophore treatment, and results in copper levels comparable to those of the untreated cells (Fig 3). Importantly the copper levels reflect the cytotoxicity data, where only 10mM NAC is able to reverse the cytotoxicity and copper accumulation associated with Elesclomol, while both 1 and 10mM NAC are able to reverse the cytotoxicity and copper accumulation associated with Disulfiram. These results indicate that NAC pretreatment dramatically prevents cellular accumulation of copper via the copper ionophores. Therefore, NAC pre-incubation appears to prevent compound activity by preventing the increase in intracellular copper levels and not via antioxidant properties.

To begin to investigate the mechanism of copper mediated cell death and any role of ROS, we explored elesclomol induced transcriptomic changes across a panel of oesophageal cancer cell lines using the NanoString nCounter platform S1 Table. Firstly, assessment of the enzymes involved in maintenance of redox homeostasis did not reveal any major induction of antioxidant enzymes, including catalase (CAT) and superoxide dismutase (SOD) (Fig 4), suggesting

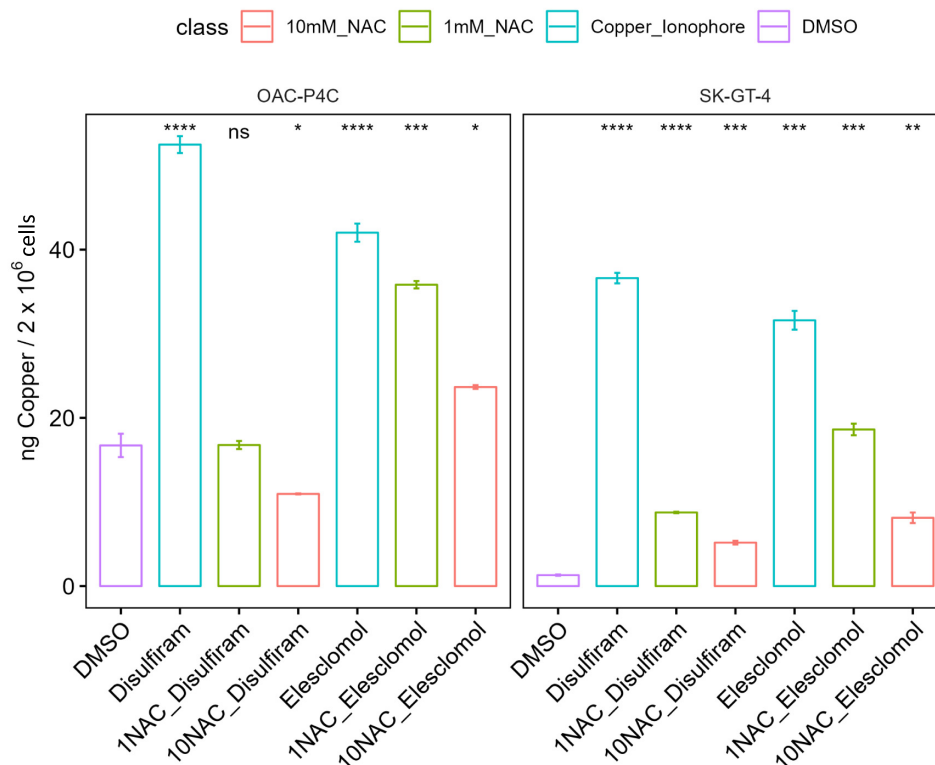

**Fig 3. NAC prevents the intracellular increase in copper caused by copper ionophores.** ICP-MS intracellular copper levels in the cell lines OAC-P4C and SK-GT-4 after Elesclomol (200nM) or Disulfiram (600nM) treatment with and without 15 min, NAC pre-treatment at 1 or 10mM. NAC = N-acetylcysteine, ICP-MS = inductively coupled massspectrometry. N = 3. P-values (Student's T-test) compared to DMSO treatment for each cell line. \* =  $p < 0.05$ , \*\* =  $p < 0.01$ , \*\*\*  $p < 0.005$ , \*\*\*\*  $p < 0.001$ .

<https://doi.org/10.1371/journal.pone.0294297.g003>

the cells do not mount an antioxidant response. However, elesclomol treatment does lead to an increase in two genes involved in thiol homeostasis, TXNRD1 and GCLC, though this may be due to direct interaction of copper with thiol groups [29, 30] rather than a result of ROS production.

Furthermore, we compared cell sensitivity to hydrogen peroxide ( $H_2O_2$ ). If ROS levels are responsible for the cell death associated with the copper ionophores then we would expect the differential sensitivity observed across oesophageal cell lines to disulfiram and elesclomol induced cytotoxicity to correlate with  $H_2O_2$  sensitivity. We have previously profiled the sensitivity of 10 oesophageal cancer cell lines and two tissue matched controls to elesclomol and disulfiram and shown that the correlation in sensitivity to the two drugs is very high (0.94) [1]. Here we have taken the most sensitive cell line OAC-P4C and the most resistant cell line FLO-1, and compared their sensitivity to  $H_2O_2$ . Results show that the copper ionophore resistant cells, FLO-1, are significantly more sensitive to oxidative stress via  $H_2O_2$  than the copper ionophore sensitive cells, OAC-P4C, or tissue matched control cells (EPC2-hTERT) (Fig 5). This is consistent with previous findings that FLO-1 have a lower antioxidant capacity and increased sensitivity to ROS inducing compounds [31]. Overall, these findings do not fit with the hypothesis that ROS levels are responsible for copper mediated cell death, particularly in relation to the copper ionophores elesclomol and disulfiram.



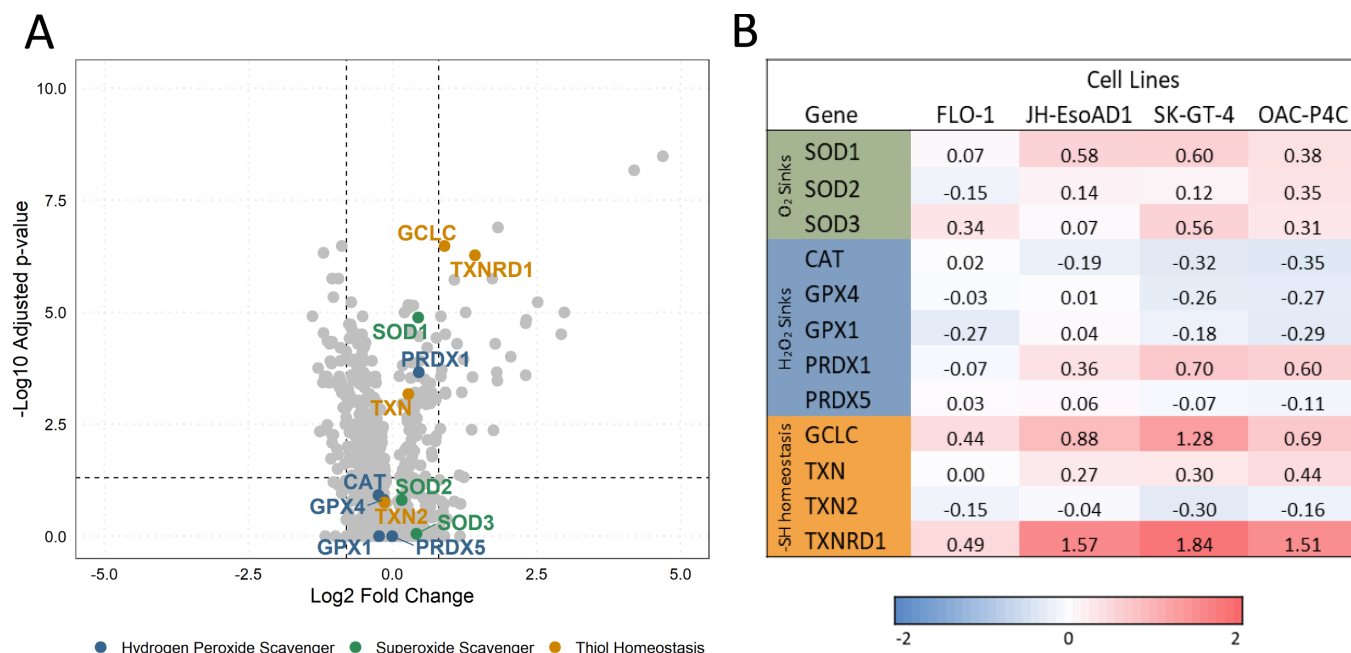

**Fig 4. Elesclomol induced transcriptomic changes in redox homeostasis genes.** A) Volcano plot for elesclomol induced differential expression analysis across FLO-1, JH-EsoAD1, SK-GT-4 and OAC-P4C cells. Redox homeostasis genes hydrogen peroxide scavengers (Blue), Superoxide scavengers (Green), Thiol homeostasis genes (Mustard) are labelled. B) Elesclomol induced transcriptomic log<sub>2</sub> fold changes for highlighted redox homeostasis enzymes across four separate cell lines; FLO-1, JH-EsoAD1, SK-GT-4 and OAC-P4C cells.

<https://doi.org/10.1371/journal.pone.0294297.g004>

## Discussion

A new form of cell death termed cuproptosis has been discovered and reviewed extensively by others [32–34]. This new form of cell death has been widely studied in relation to a novel class of copper ionophores, including elesclomol and disulfiram. While there is a wealth of evidence that these compounds lead to the intracellular accumulation of copper, the exact mechanism leading to cell death remains contentious.

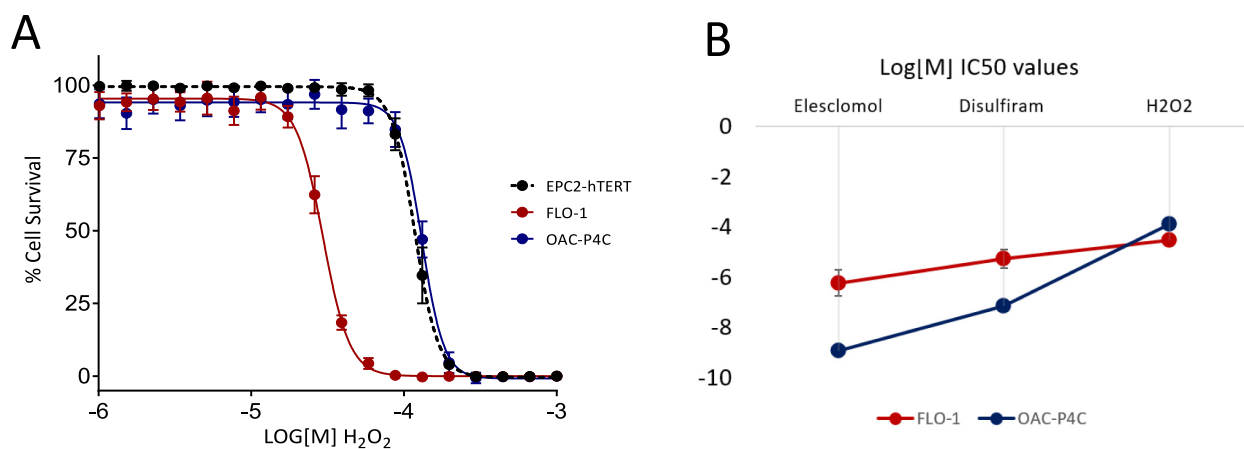

**Fig 5. Sensitivity to copper ionophores and H<sub>2</sub>O<sub>2</sub>.** A) H<sub>2</sub>O<sub>2</sub> dose responses for OAC cell lines OAC-P4C and FLO-1, and tissue matched control EPC2-hTERT. B) Log molar IC<sub>50</sub> values for Elesclomol, Disulfiram and H<sub>2</sub>O<sub>2</sub>, across the FLO-1 and OAC-P4C cell lines.

<https://doi.org/10.1371/journal.pone.0294297.g005>

It has been proposed that the intracellular copper accumulation leads to the production of ROS and that this is the cause of cell death [4, 10–13]. Much of the evidence for this is based on the ability of the small molecule NAC to alleviate the toxicity of the drugs [10, 12, 13, 19]. Here we have demonstrated across multiple cell lines and drugs that while NAC does indeed alleviate the cytotoxic effects of these copper ionophores it is only at concentrations where it significantly reduces copper cellular uptake. This suggests that it is the reduction in copper accumulation that is responsible for the diminished cell death. Given that NAC has and is still widely used in cell culture-based studies investigating the role of ROS generation in copper toxicity, we believe it is important to disseminate the finding that NAC interferes with the intracellular accumulation of copper caused by copper ionophores, confounding conclusions drawn as to the effects of ROS.

We do not know the exact mechanism through which NAC significantly reduces copper cellular accumulation caused by the ionophores but disulfiram requires Cu(II) or an acidic environment for its conversion to an active metabolite diethylthiocarbamate (DETC) [5], and since NAC is a potent reducing agent and has been shown to potentially reduce Cu(II) to Cu(I) [35] this is likely to prevent the conversion of Disulfiram to DETC, blocking its ability to act as a copper ionophore. Elesclomol on the other hand does not require conversion for its activity, however Elesclomol chelates Cu(II) [4] so if the copper in the culture media is reduced by NAC then this is likely to prevent the copper ionophore effect of Elesclomol. This may also explain why only high concentrations of NAC are able to block elesclomol activity. It is also possible that NAC is directly interacting with the copper or elesclomol itself, leading to sequestration [20, 24].

Our results also demonstrate a lack of evidence that ROS is the major contributor to cuproptosis and copper ionophore induced cell death. Our transcriptomic results suggest that cells do not mount a strong antioxidant reaction in response to the copper ionophores. In fact,  $H_2O_2$  sink enzymes glutathione peroxidase 1 and 4 (GPX1, GPX4), and catalase (CAT) are marginally downregulated. These copper ionophore mediated transcriptional changes mirror almost perfectly the results of a similar study, using a different cell model system, on cuproptosis using excess concentrations of Cu (II) in the culture media [35] where they also demonstrate that there is no upregulation of antioxidant enzymes in response to excess copper.

While we see no induction of  $O_2\bullet^-$  or  $H_2O_2$  cellular antioxidants in our cell lines, in future work it will be important to rigorously assess which if any ROS species are produced by elesclomol and disulfiram. Further it will be important to assess whether specific scavengers are able to rescue the cytotoxicity in order to conclusively evaluate whether ROS induction contributes to elesclomol and disulfiram induced cell death. Extensively testing the effects of specific antioxidants such as thiourea [36], ebselen [37], and trolox [38], may help to elucidate the contribution, if any, of ROS species towards elesclomol and disulfiram induced cell death (see [20] for a review of ROS scavengers and their properties). However, it is vital to ensure that these scavengers do not also affect intracellular copper accumulation, or directly interact with copper or the ionophores since for example ascorbic acid is a well-known scavenger of  $O_2\bullet^-$  – and  $H_2O_2$  in vitro, but it is also known that in the presence of metals, such as iron, it becomes a powerful source of ROS [39]. Furthermore, Glutathione another well-known scavenger has been shown to prevent copper mediated toxicity but critically via direct binding and sequestering of copper ions [35], again confounding conclusions drawn from studies of copper mediated toxicity and the antioxidant glutathione.

Finally, emerging evidence indicates that copper induced cytotoxicity may be mediated via multiple mechanisms which are likely to be context dependent and different between the chemicals used to induce death (e.g. copper ionophores, interaction of agents with excess levels of endogenous or addition of exogenous copper, and other copper interacting compounds)



possibly explaining the conflicting evidence with regards to the mechanism of copper induced toxicity. For example, the anticancer activity of plant polyphenols has been hypothesized to involve mobilisation of endogenous copper and consequent DNA breakage [40, 41]. However, recent studies have shown that DNA damage was not induced in response to elesclomol treatment of colorectal cancer cells [12]. This suggests distinct mechanisms of copper mediated cell death, making it difficult to generalize across contexts.

Collectively our data indicate that NAC should be used with caution in experiments designed to ascertain the role of ROS in copper ionophore mediated cell death and cuproptosis in general and that this novel form of cell death requires further study to fully elucidate its mechanism.

## Supporting information

**S1 Table. Nanostring differential expression data.** Elesclomol 200nM vs DMSO. (CSV)

## Acknowledgments

We would like to thank A. Rustig, University of Pennsylvania for provision of the EPC2-hTERT cells and Lorna Eadies at the ICP Facility, School of Chemistry, University of Edinburgh for running the ICP-MS experiments.

## Author Contributions

**Conceptualization:** Rebecca E. Graham, Richard J. R. Elliott, Neil O. Carragher.

**Formal analysis:** Rebecca E. Graham, Richard J. R. Elliott.

**Funding acquisition:** Neil O. Carragher.

**Investigation:** Rebecca E. Graham, Richard J. R. Elliott, Alison F. Munro.

**Methodology:** Rebecca E. Graham.

**Project administration:** Neil O. Carragher.

**Supervision:** Neil O. Carragher.

**Visualization:** Rebecca E. Graham.

**Writing – original draft:** Rebecca E. Graham, Neil O. Carragher.

**Writing – review & editing:** Rebecca E. Graham, Richard J. R. Elliott, Alison F. Munro, Neil O. Carragher.

## References

1. Hughes RE, Elliott RJR, Li X, Munro AF, Makda A, Carter RN, et al. Multiparametric High-Content Cell Painting Identifies Copper Ionophores as Selective Modulators of Esophageal Cancer Phenotypes. *ACS Chem Biol.* 2022; 17: 1876–1889. <https://doi.org/10.1021/acscchembio.2c00301> PMID: 35696676
2. Tsvetkov P, Detappe A, Cai K, Keys HR, Brune Z, Ying W, et al. Mitochondrial metabolism promotes adaptation to proteotoxic stress. *Nat Chem Biol.* 2019; 15: 681–689. <https://doi.org/10.1038/s41589-019-0291-9> PMID: 31133756
3. Tsvetkov P, Coy S, Petrova B, Dreishpoon M, Verma A, Abdusamad M, et al. Copper induces cell death by targeting lipoylated TCA cycle proteins. *Science.* 2022; 375: 1254–1261. <https://doi.org/10.1126/science.abf0529> PMID: 35298263
4. Nagai M, Vo NH, Shin Ogawa L, Chimmanamada D, Inoue T, Chu J, et al. The oncology drug elesclomol selectively transports copper to the mitochondria to induce oxidative stress in cancer cells. *Free*

- Radic Biol Med. 2012; 52: 2142–2150. <https://doi.org/10.1016/j.freeradbiomed.2012.03.017> PMID: 22542443
5. Kragh HS. From Disulfiram to Antabuse: The Invention of a Drug. *Bull Hist Chem*. 2008; 33: 82–88.
  6. Dalecki AG, Haeili M, Shah S, Speer A, Niederweis M, Kutsch O, et al. Disulfiram and copper ions kill *Mycobacterium tuberculosis* in a synergistic manner. *Antimicrob Agents Chemother*. 2015; 59: 4835–4844. <https://doi.org/10.1128/AAC.00692-15> PMID: 26033731
  7. Wu L, Zhou L, Liu DQ, Vogt FG, Kord AS. LC–MS/MS and density functional theory study of copper(II) and nickel(II) chelating complexes of elesclomol (a novel anticancer agent). *J Pharm Biomed Anal*. 2011; 54: 331–336. <https://doi.org/10.1016/j.jpba.2010.09.007> PMID: 20933353
  8. Nagai M, Vo NH, Shin Ogawa L, Chimmanamada D, Inoue T, Chu J, et al. The oncology drug elesclomol selectively transports copper to the mitochondria to induce oxidative stress in cancer cells. *Free Radic Biol Med*. 2012; 52: 2142–2150. <https://doi.org/10.1016/j.freeradbiomed.2012.03.017> PMID: 22542443
  9. Wu L, Zhou L, Liu DQ, Vogt FG, Kord AS. LC–MS/MS and density functional theory study of copper(II) and nickel(II) chelating complexes of elesclomol (a novel anticancer agent). *J Pharm Biomed Anal*. 2011; 54: 331–336. <https://doi.org/10.1016/j.jpba.2010.09.007> PMID: 20933353
  10. Kirshner JR, He S, Balasubramanyam V, Kepros J, Yang C-Y, Zhang M, et al. Elesclomol induces cancer cell apoptosis through oxidative stress. *Mol Cancer Ther*. 2008; 7: 2319–2327. <https://doi.org/10.1158/1535-7163.MCT-08-0298> PMID: 18723479
  11. Barbi de Moura M, Vincent G, Fayewicz SL, Bateman NW, Hood BL, Sun M, et al. Mitochondrial Respiration—An Important Therapeutic Target in Melanoma. Santos J, editor. *PLoS One*. 2012; 7: e40690. <https://doi.org/10.1371/journal.pone.0040690> PMID: 22912665
  12. Gao W, Huang Z, Duan J, Nice EC, Lin J, Huang C. Lasiloo induces copper-dependent ferroptosis in colorectal cancer cells via degradation of ATP7A. *Mol Oncol*. 2021; 15: 3527. <https://doi.org/10.1002/1878-0261.13079>
  13. Buccarelli M D'Alessandris QG, Matarrese P, Molinaro C, Signore M, Cappannini A, et al. Elesclomol-induced increase of mitochondrial reactive oxygen species impairs glioblastoma stem-like cell survival and tumor growth. *J Exp Clin Cancer Res*. 2021;40. <https://doi.org/10.1186/S13046-021-02031-4> PMID: 34253243
  14. Chen D, Cui QC, Yang H, Dou QP. Disulfiram, a clinically used anti-alcoholism drug and copper-binding agent, induces apoptotic cell death in breast cancer cultures and xenografts via inhibition of the proteasome activity. *Cancer Res*. 2006; 66: 10425–10433. <https://doi.org/10.1158/0008-5472.CAN-06-2126> PMID: 17079463
  15. Hasinoff BB, Patel D. Disulfiram is a slow-binding partial noncompetitive inhibitor of 20S proteasome activity. *Arch Biochem Biophys*. 2017; 633: 23–28. <https://doi.org/10.1016/j.abb.2017.09.003> PMID: 28887129
  16. Lövborg H, Öberg F, Rickardson L, Gullbo J, Nygren P, Larsson R. Inhibition of proteasome activity, nuclear factor-KB translocation and cell survival by the antialcoholism drug disulfiram. *Int J Cancer*. 2006; 118: 1577–1580. <https://doi.org/10.1002/ijc.21534> PMID: 16206267
  17. Blackman RK, Cheung-Ong K, Gebbia M, Proia DA, He S, Kepros J, et al. Mitochondrial Electron Transport Is the Cellular Target of the Oncology Drug Elesclomol. Santos J, editor. *PLoS One*. 2012; 7: e29798. <https://doi.org/10.1371/journal.pone.0029798> PMID: 22253786
  18. Modica-Napolitano JS, Bharath LP, Hanlon AJ, Hurley LD. The anticancer agent elesclomol has direct effects on mitochondrial bioenergetic function in isolated mammalian mitochondria. *Biomolecules*. 2019;9. <https://doi.org/10.3390/biom9080298> PMID: 31344923
  19. Kwan S-Y, Cheng X, Tsang YTM, Choi J-S, Kwan S-Y, Izaguirre DI, et al. Loss of ARID1A expression leads to sensitivity to ROS-inducing agent elesclomol in gynecologic cancer cells. *Oncotarget*. 2016; 7: 56933–56943. <https://doi.org/10.18632/oncotarget.10921> PMID: 27486766
  20. Mlejnek P. Direct Interaction between N-Acetylcysteine and Cytotoxic Electrophile—An Overlooked In Vitro Mechanism of Protection. *Antioxidants* 2022, Vol 11, Page 1485. 2022; 11: 1485. <https://doi.org/10.3390/antiox11081485> PMID: 36009205
  21. Kelly GS. Clinical applications of N-acetylcysteine. *Altern Med Rev*. 1998; 3: 114–127. Available: <https://europepmc.org/article/med/9577247/reload=0> PMID: 9577247
  22. Flanagan RJ, Meredith TJ. Use of N-acetylcysteine in clinical toxicology. *Am J Med*. 1991; 91: S131–S139. [https://doi.org/10.1016/0002-9343\(91\)90296-a](https://doi.org/10.1016/0002-9343(91)90296-a) PMID: 1928204
  23. Pedre B, Barayeu U, Ezeriņa D, Dick TP. The mechanism of action of N-acetylcysteine (NAC): The emerging role of H<sub>2</sub>S and sulfane sulfur species. *Pharmacol Ther*. 2021; 228: 107916. <https://doi.org/10.1016/j.pharmthera.2021.107916> PMID: 34171332

24. Zheng J, Lou JR, Zhang XX, Benbrook DM, Hanigan MH, Lind SE, et al. N-Acetylcysteine interacts with copper to generate hydrogen peroxide and selectively induce cancer cell death. *Cancer Lett.* 2010; 298: 186–194. <https://doi.org/10.1016/j.canlet.2010.07.003> PMID: 20667650
25. Mi L, Sirajuddin P, Gan N, Wang X. A cautionary note on using N-acetylcysteine as an antagonist to assess isothiocyanate-induced reactive oxygen species-mediated apoptosis. *Anal Biochem.* 2010; 405: 269–271. <https://doi.org/10.1016/j.ab.2010.06.015> PMID: 20541518
26. Rampersad SN. Multiple applications of Alamar Blue as an indicator of metabolic function and cellular health in cell viability bioassays. *Sensors (Basel).* 2012; 12: 12347–12360. <https://doi.org/10.3390/s120912347> PMID: 23112716
27. Mlejnek P, Dolezel P. N-acetylcysteine prevents the geldanamycin cytotoxicity by forming geldanamycin–N-acetylcysteine adduct. *Chem Biol Interact.* 2014; 220: 248–254. <https://doi.org/10.1016/j.cbi.2014.06.025> PMID: 24998639
28. Mittal M, Khan K, Pal S, Porwal K, China SP, Barbhuyan TK, et al. The Thiocarbamate Disulphide Drug, Disulfiram Induces Osteopenia in Rats by Inhibition of Osteoblast Function Due to Suppression of Acetaldehyde Dehydrogenase Activity. *Toxicological Sciences.* 2014; 139: 257–270. <https://doi.org/10.1093/toxsci/ktu020> PMID: 24496638
29. Kreitman GY, Danilewicz JC, Jeffery DW, Elias RJ. Reaction Mechanisms of Metals with Hydrogen Sulfide and Thiols in Model Wine. Part 1: Copper-Catalyzed Oxidation. *J Agric Food Chem.* 2016; 64: 4095–4104. <https://doi.org/10.1021/acs.jafc.6b00641> PMID: 27133282
30. Letelier ME, Lepe AM, Faúndez M, Salazar J, Marín R, Aracena P, et al. Possible mechanisms underlying copper-induced damage in biological membranes leading to cellular toxicity. *Chem Biol Interact.* 2005; 151: 71–82. <https://doi.org/10.1016/j.cbi.2004.12.004> PMID: 15698579
31. Liu DS, Duong CP, Haupt S, Montgomery KG, House CM, Azar WJ, et al. Inhibiting the system xC<sup>-</sup>/glutathione axis selectively targets cancers with mutant-p53 accumulation. *Nat Commun.* 2017; 8: 1–14. <https://doi.org/10.1038/ncomms14844> PMID: 28348409
32. Chen L, Min J, Wang F. Copper homeostasis and cuproptosis in health and disease. *Signal Transduction and Targeted Therapy* 2022 7:1. 2022; 7: 1–16. <https://doi.org/10.1038/s41392-022-01229-y> PMID: 36414625
33. Tong X, Tang R, Xiao M, Xu J, Wang W, Zhang B, et al. Targeting cell death pathways for cancer therapy: recent developments in necroptosis, pyroptosis, ferroptosis, and cuproptosis research. *Journal of Hematology & Oncology* 2022 15:1. 2022; 15: 1–32. <https://doi.org/10.1186/s13045-022-01392-3> PMID: 36482419
34. Xie J, Yang Y, Gao Y, He J. Cuproptosis: mechanisms and links with cancers. *Molecular Cancer* 2023 22:1. 2023; 22: 1–30. <https://doi.org/10.1186/s12943-023-01732-y> PMID: 36882769
35. Saporito-Magriñá CM, Musacco-Sebio RN, Andrieux G, Kook L, Orrego MT, Tuttolomondo MV, et al. Copper-induced cell death and the protective role of glutathione: The implication of impaired protein folding rather than oxidative stress. *Metallomics.* 2018; 10: 1743–1754. <https://doi.org/10.1039/c8mt00182k> PMID: 30311620
36. Kelner MJ, Bagnell R, Welch KJ. Thioureas react with superoxide radicals to yield a sulfhydryl compound. Explanation for protective effect against paraquat. *Journal of Biological Chemistry.* 1990; 265: 1306–1311. [https://doi.org/10.1016/S0021-9258\(19\)40014-8](https://doi.org/10.1016/S0021-9258(19)40014-8) PMID: 2153125
37. Azad GK, Tomar RS. Ebselen, a promising antioxidant drug: Mechanisms of action and targets of biological pathways. *Mol Biol Rep.* 2014; 41: 4865–4879. <https://doi.org/10.1007/s11033-014-3417-x> PMID: 24867080
38. Bisby RH, Ahmed S, Cundall RB. Repair of amino acid radicals by a vitamin E analogue. *Biochem Biophys Res Commun.* 1984; 119: 245–251. [https://doi.org/10.1016/0006-291x\(84\)91644-9](https://doi.org/10.1016/0006-291x(84)91644-9) PMID: 6704121
39. Halliwell B. Drug Antioxidant Effects: A Basis for Drug Selection? *Drugs.* 1991; 42: 569–605. <https://doi.org/10.2165/00003495-199142040-00003/METRICS>
40. Azmi AS, Bhat SH, Hadi SM. Resveratrol-Cu(II) induced DNA breakage in human peripheral lymphocytes: implications for anticancer properties. *FEBS Lett.* 2005; 579: 3131–3135. <https://doi.org/10.1016/j.febslet.2005.04.077> PMID: 15919081
41. Hadi SM, Bhat SH, Azmi AS, Hanif S, Shamim U, Ullah MF. Oxidative breakage of cellular DNA by plant polyphenols: a putative mechanism for anticancer properties. *Semin Cancer Biol.* 2007; 17: 370–376. <https://doi.org/10.1016/j.semcancer.2007.04.002> PMID: 17572102
